# Supplementary material for: Synaptic dysfunction induced by glycine‐alanine dipeptides in C9orf72‐ALS/FTD is rescued by SV2 replenishment
Source: PubMed Central journal article supplement (PMC7207170; doi:10.15252/emmm.201910722), 2020-04-29
Supplement: EMMM-12-e10722-s001.pdf [file EMMM-12-e10722-s001.pdf]

# APPENDIX TABLES S1 - S2

## APPENDIX TABLE S1

### Exact *p*-values for Figures

| Figure | Statistical Test                            | Comparison                                                           | <i>p</i> -value |
|--------|---------------------------------------------|----------------------------------------------------------------------|-----------------|
| 2C     | one-way ANOVA                               | GA length dependence cortical                                        | 0.0035          |
| 2D     | one-way ANOVA                               | GA length dependence motor                                           | <0.0001         |
| 3B     | Cox proportional hazard<br>log-rank test    | GA50 compared with control cortical                                  | <0.0001         |
|        |                                             | GA50 compared with control cortical                                  | <0.0001         |
|        | Cox proportional hazard<br>log-rank p value | GA100 compared with control cortical                                 | 0.0025          |
|        |                                             | GA100 compared with control cortical                                 | <0.0001         |
| 3C     | Cox proportional hazard<br>log-rank test    | GA50 compared with control motor                                     | 0.0018          |
|        |                                             | GA50 compared with control motor                                     | <0.0001         |
|        | Cox proportional hazard<br>log-rank p value | GA100 compared with control motor                                    | <0.0001         |
|        |                                             | GA100 compared with control motor                                    | <0.0001         |
| 4C     | Sidak multiple comparison                   | GA50 versus GFP                                                      | <0.0001         |
| 5B     | Uncorrected Fisher's LSD test               | mCherry versus GA50 cortical                                         | 0.0009          |
|        | Uncorrected Fisher's LSD test               | mCherry no calcium versus GA50 no calcium cortical                   | 0.935           |
| 5C     | Uncorrected Fisher's LSD test               | mCherry versus GA50 motor                                            | 0.0266          |
|        | Uncorrected Fisher's LSD test               | mCherry no calcium versus GA50 no calcium motor                      | 0.9314          |
| 6C     | one-way ANOVA                               | SV2 puncta GA length dependence compared with GFP cortical           | <0.0001         |
|        | one-way ANOVA                               | Total neurite length GA length dependence compared with GFP cortical | 0.6015          |
| 6D     | one-way ANOVA                               | SV2 puncta GA length dependence compared with GFP motor              | <0.0001         |
|        | one-way ANOVA                               | Total neurite length GA length dependence compared with GFP motor    | 0.4707          |
| 7C     | unpaired t-test                             | isogenic versus c9 line                                              | <0.0001         |
| 7D     | unpaired t-test                             | isogenic versus c9 line                                              | 0.2789          |
| 7E     | unpaired t-test                             | isogenic versus c9 line                                              | 0.0162          |
| 7F     | unpaired t-test                             | isogenic versus c9 line                                              | 0.0269          |
| 7G     | unpaired t-test                             | control versus c9 lines                                              | 0.1116          |
| 7H     | unpaired t-test                             | control versus c9 lines                                              | 0.2606          |
| 8A     | Sidak multiple comparison                   | GFP versus GA50                                                      | <0.0001         |
|        | Sidak multiple comparison                   | GFP versus GFP+ SV2                                                  | 0.6237          |
|        | Sidak multiple comparison                   | GA50 versus GA50 +SV2                                                | 0.0037          |
|        | Sidak multiple comparison                   | GFP versus GA50+SV2                                                  | 0.2859          |
| 8B     | Uncorrected Fisher's LSD test               | mCherry versus GA50                                                  | 0.0248          |
|        | Uncorrected Fisher's LSD test               | mCherry + SV2 versus GA50 + SV2                                      | 0.1834          |
| 8C     | Cox proportional hazard<br>log-rank test    | GA50 compared with control cortical                                  | <0.0001         |
|        |                                             | GA50 compared with control cortical                                  | <0.0001         |
|        | Cox proportional hazard<br>log-rank p value | GA50 +SV2 compared with control cortical                             | 0.0043          |
|        |                                             | GA50 +SV2 compared with control cortical                             | <0.0001         |
| 8D     | Cox proportional hazard<br>log-rank test    | PR50 compared with control cortical                                  | <0.0001         |
|        |                                             | PR50 compared with control cortical                                  | <0.0001         |
|        | Cox proportional hazard<br>log-rank p value | PR50 +SV2 compared with control cortical                             | <0.0001         |
|        |                                             | P50 +SV2 compared with control cortical                              | <0.0001         |
| 8E     | Cox proportional hazard<br>log-rank test    | GA50 compared with control motor                                     | 0.0009          |
|        |                                             | GA50 compared with control motor                                     | <0.0001         |
|        | Cox proportional hazard<br>log-rank p value | GA50 +SV2 compared with SV2 control motor                            | 0.0582          |
|        |                                             | GA50 +SV2 compared with SV2 control motor                            | <0.0001         |
| 9A     | unpaired t-test                             | wild type versus Tgx GA149                                           | 0.0495          |
| 9B     | unpaired t-test                             | wild type versus Tgx GA149                                           | 0.8242          |
| 9C     | unpaired t-test                             | wild type versus Tgx GA149                                           | 0.7246          |
| 10B    | unpaired t-test                             | wild type versus Tgx GA149                                           | 0.0003          |
| 10C    | unpaired t-test                             | wild type versus Tgx GA149                                           | 0.0873          |

**APPENDIX TABLE S2****Exact *p*-values for Expanded View Figures**

| EV Figure | Statistical Test              | Comparison                                                     | <i>p</i> -value |
|-----------|-------------------------------|----------------------------------------------------------------|-----------------|
| EV2C      | one-way ANOVA                 | GFP versus GA length mitochondrial velocity cortical           | 0.9716          |
| EV2D      | one-way ANOVA                 | GFP versus GA length mitochondrial velocity motor              | 0.9742          |
| EV2E      | Dunnett's multiple comparison | GFP versus GA25                                                | 0.5159          |
|           | Dunnett's multiple comparison | GFP versus GA50                                                | 0.9645          |
|           | Dunnett's multiple comparison | GFP versus GA100                                               | 0.9672          |
|           | Dunnett's multiple comparison | GFP versus GA200                                               | 0.5146          |
|           | Dunnett's multiple comparison | GFP versus GA400                                               | 0.0296          |
| EV2F      | unpaired t-test               | mCherry versus GA50, SV2 mRNA beacon cortical                  | 0.5782          |
| EV3A      | one-way ANOVA                 | GA length dependence                                           | 0.1137          |
|           | Dunnett's multiple comparison | GFP versus GA25                                                | 0.0145          |
|           | Dunnett's multiple comparison | GFP versus GA50                                                | 0.0081          |
|           | Dunnett's multiple comparison | GFP versus GA100                                               | 0.3960          |
|           | Dunnett's multiple comparison | GFP versus GA200                                               | 0.0045          |
|           | Dunnett's multiple comparison | GFP versus GA400                                               | 0.9532          |
| EV3B      | one-way ANOVA                 | SynPhys puncta GA length dependence compared with GFP cortical | 0.2725          |
|           | one-way ANOVA                 | PSD95 puncta GA length dependence compared with GFP cortical   | 0.9791          |
| EV3C      | one-way ANOVA                 | SynPhys puncta GA length dependence compared with GFP motor    | 0.6216          |
|           | one-way ANOVA                 | PSD95 puncta GA length dependence compared with GFP motor      | 0.9925          |
| EV4C      | unpaired t-test               | control versus SV2 pRRL                                        | 0.0071          |
| EV4D      | unpaired t-test               | control versus SV2 pRRL                                        | 0.0003          |
| EV4F      | Sidak multiple comparison     | mCherry versus GA50                                            | 0.0002          |
|           |                               | mCherry versus mCherry SV2 pRRL                                | 0.0002          |
|           |                               | mCherry versus GA50 SV2 pRRL                                   | 0.9846          |
|           |                               | GA50 versus GA50 SV2 pRRL                                      | 0.0024          |
|           |                               | mCherry SV2 pRRL versus GA50 SV2 pRRL                          | <0.0001         |
