# Supplementary material for: Synaptic dysfunction induced by glycine‐alanine dipeptides in C9orf72‐ALS/FTD is rescued by SV2 replenishment
Source: PubMed Central journal article supplement (PMC7207170; doi:10.15252/emmm.201910722), 2020-04-29

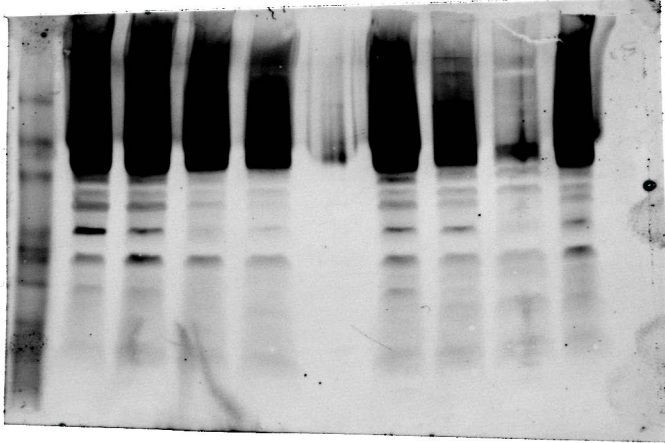

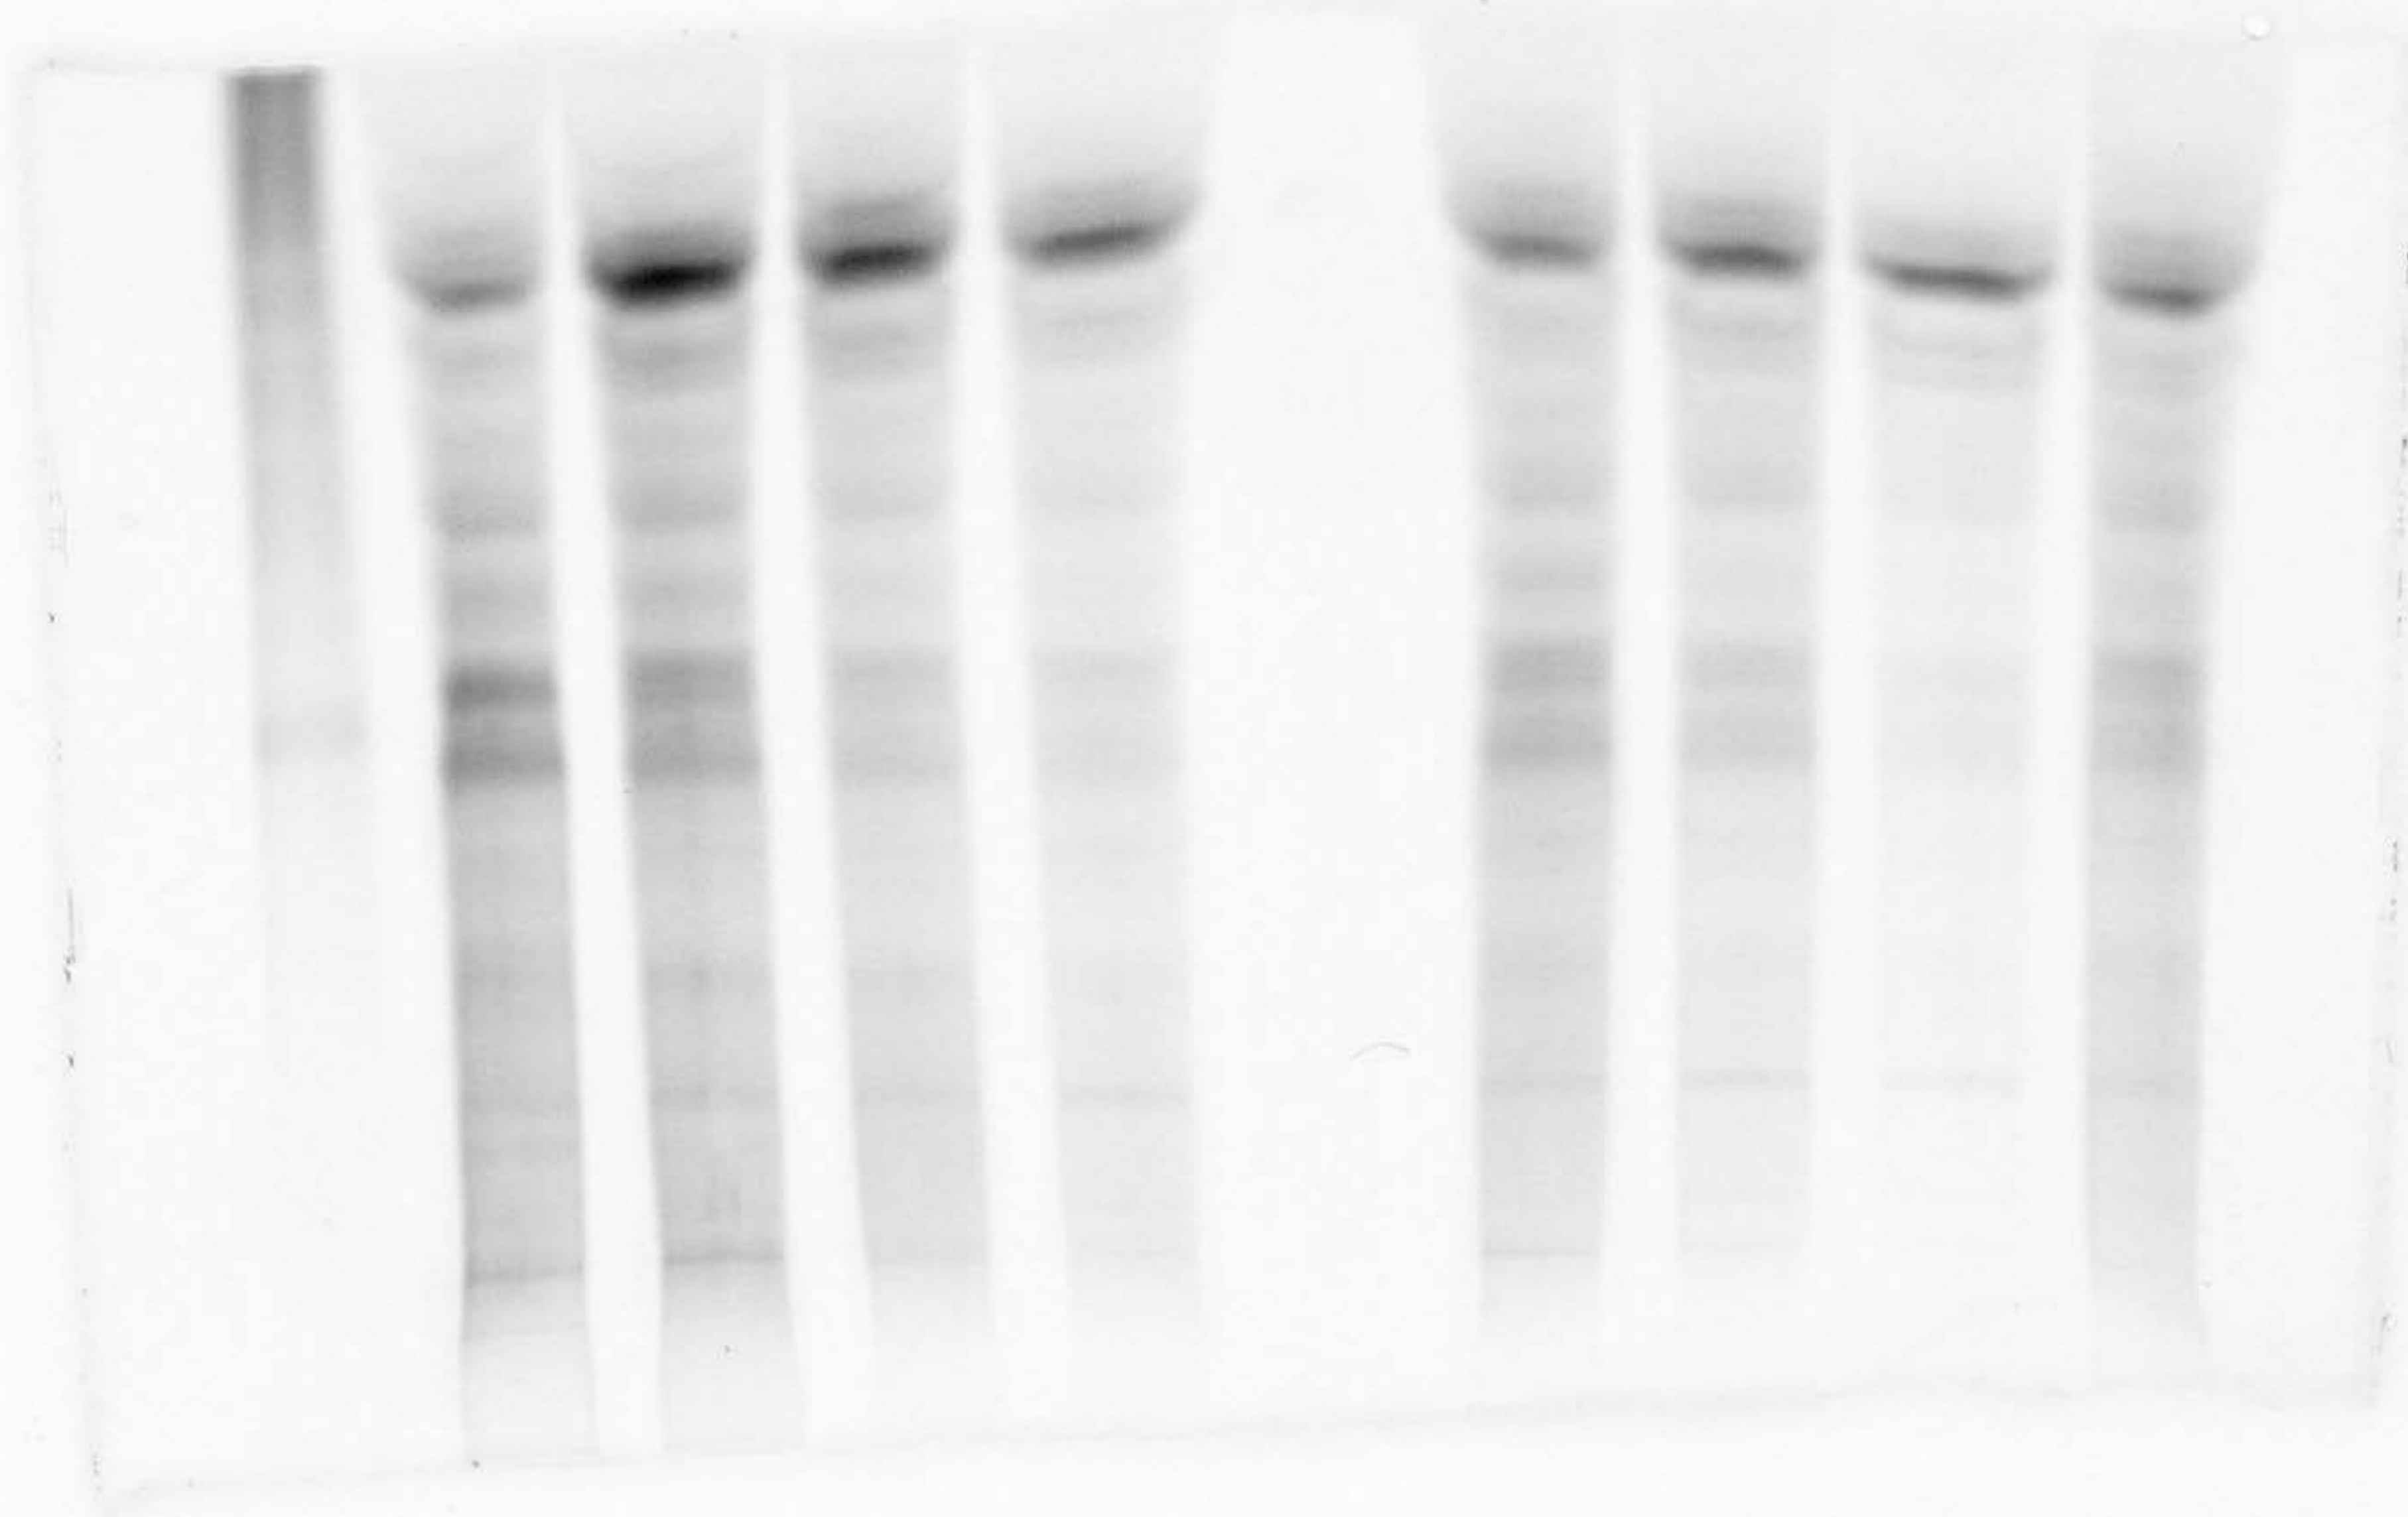

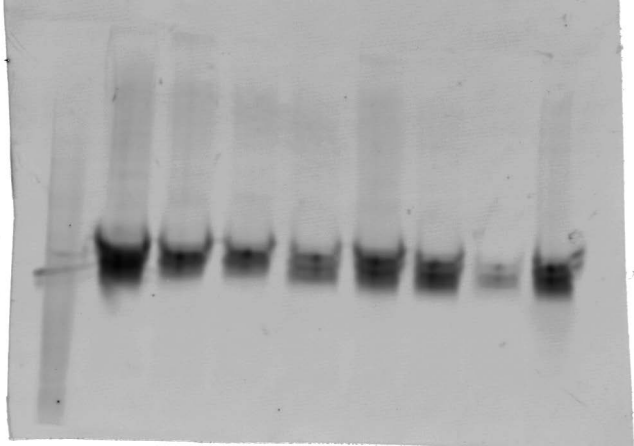

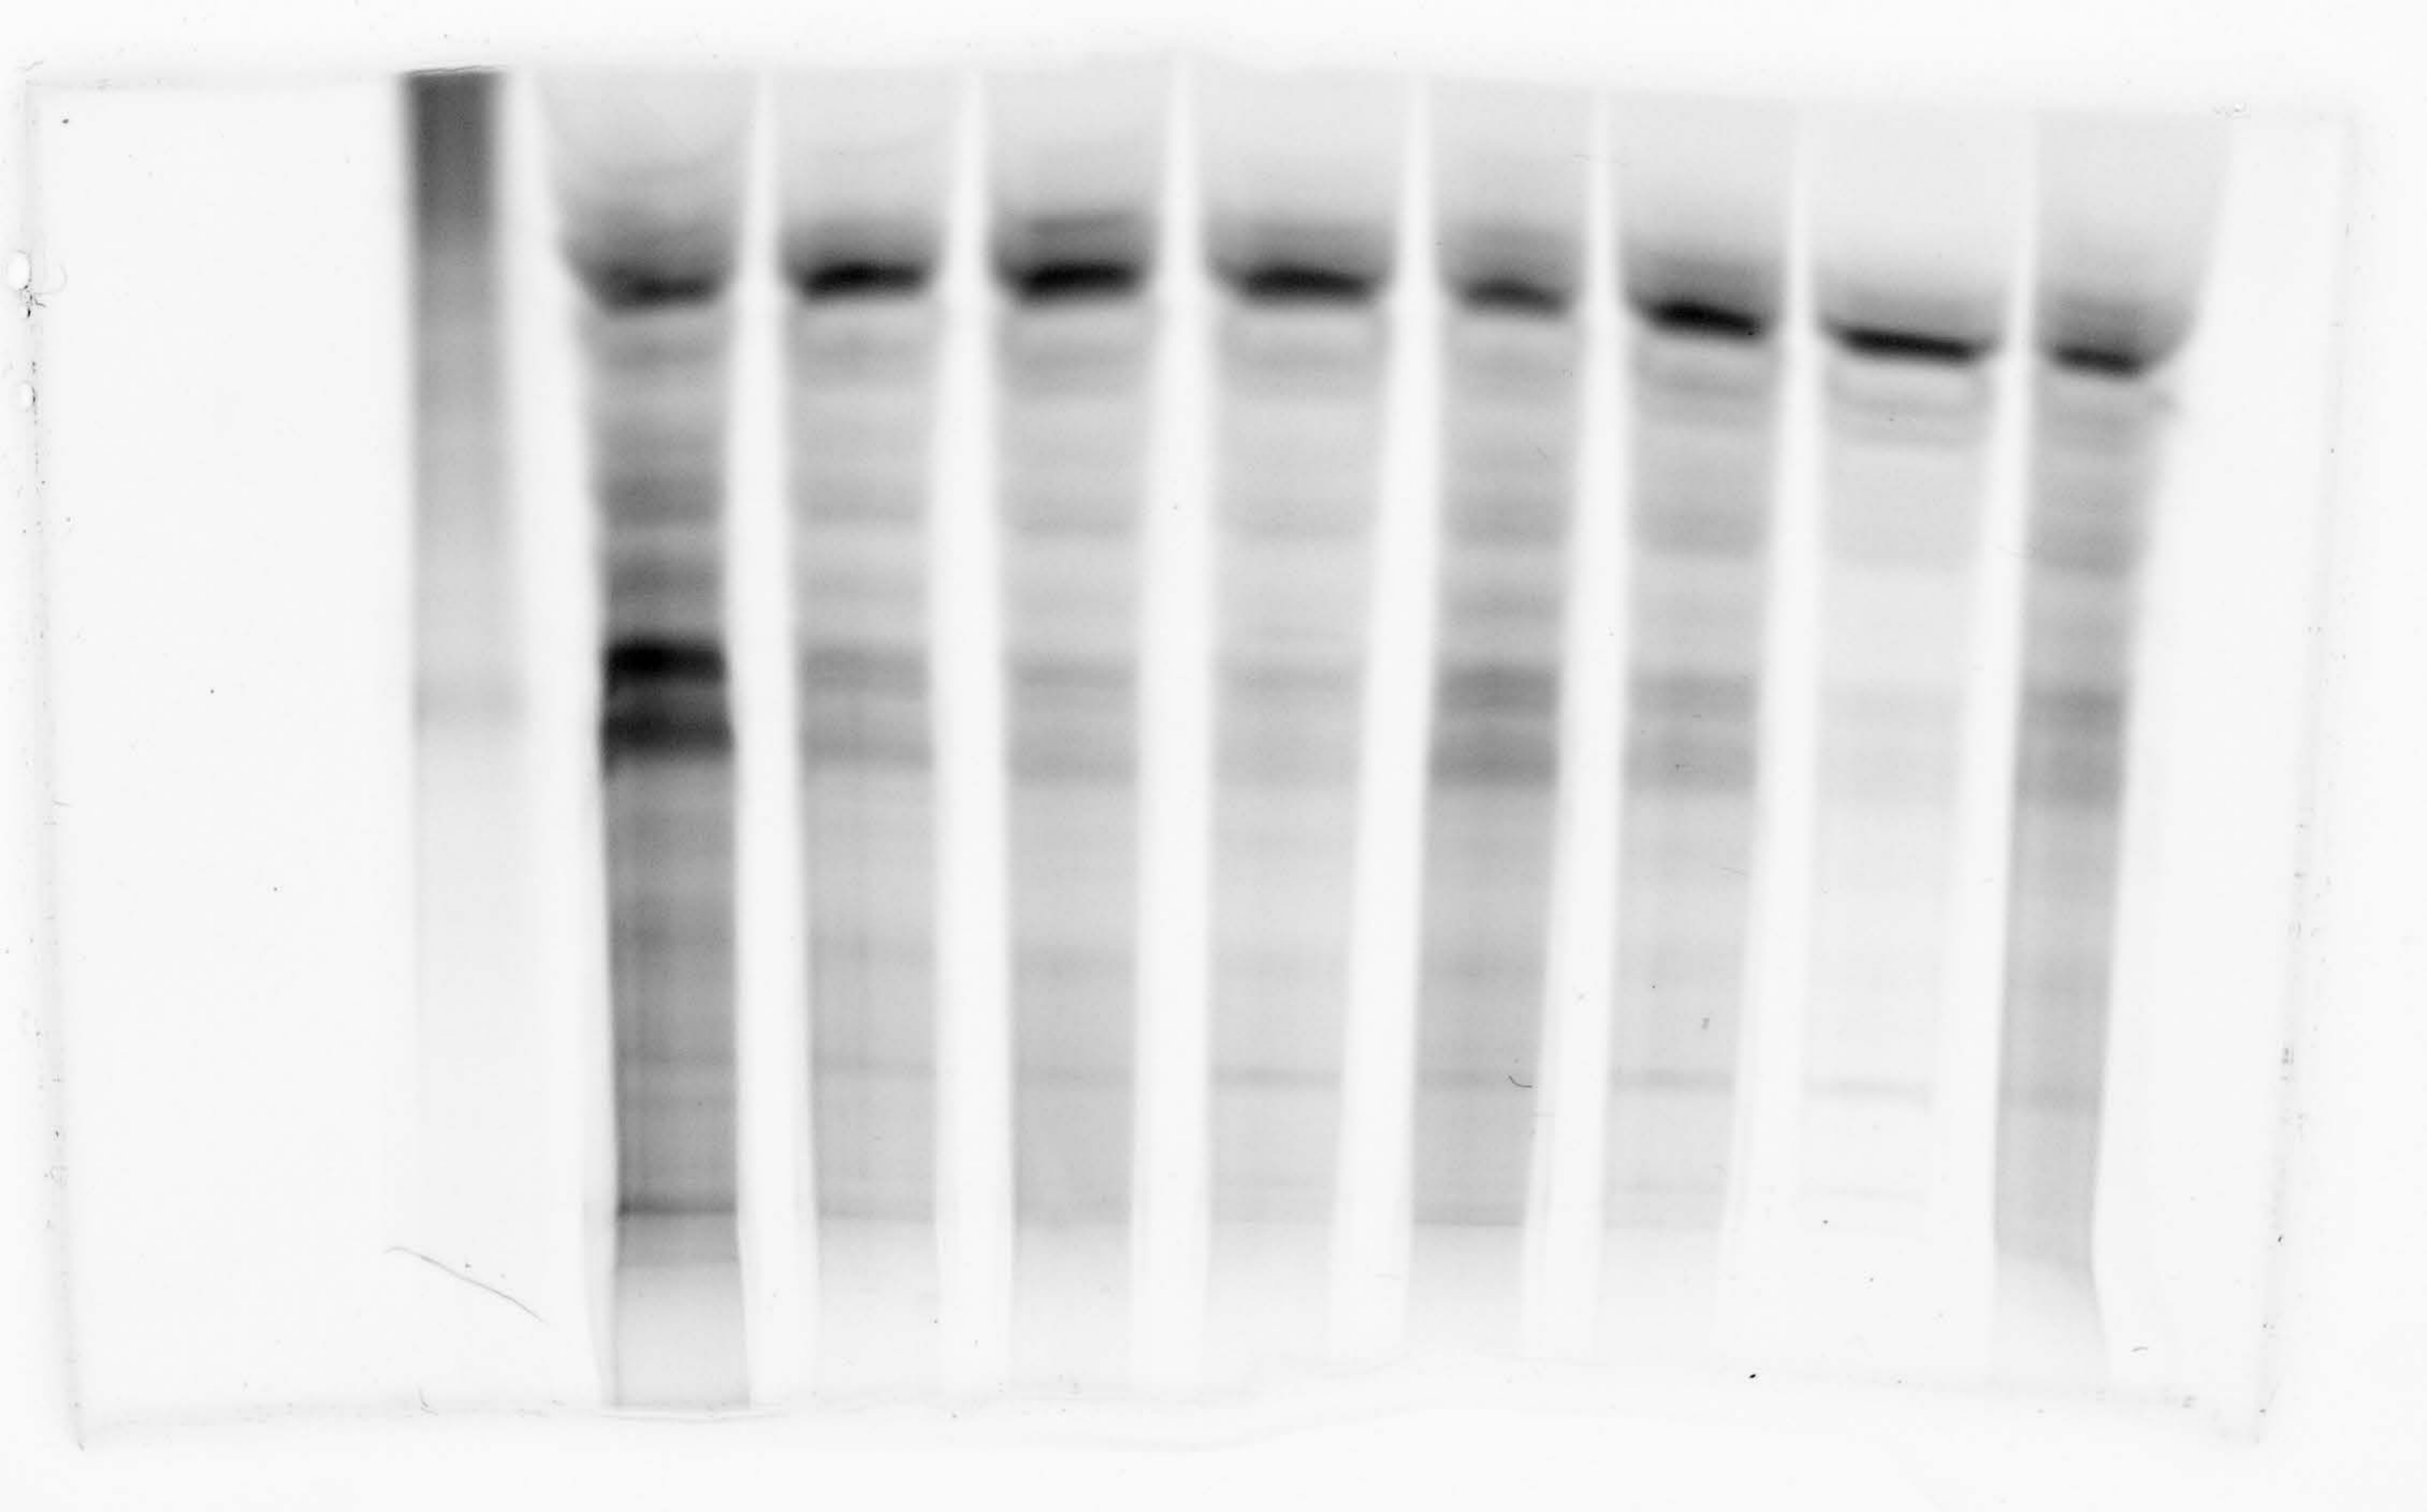

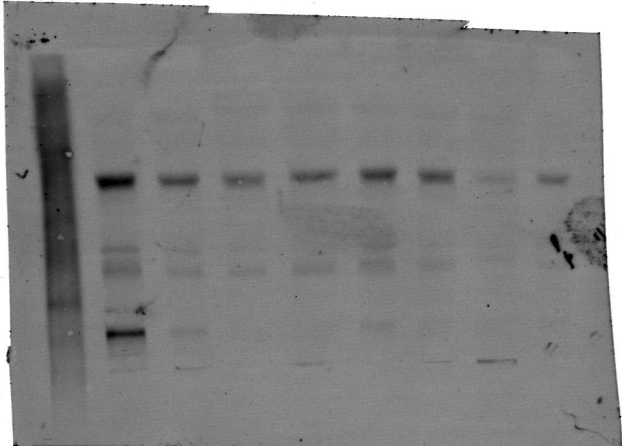

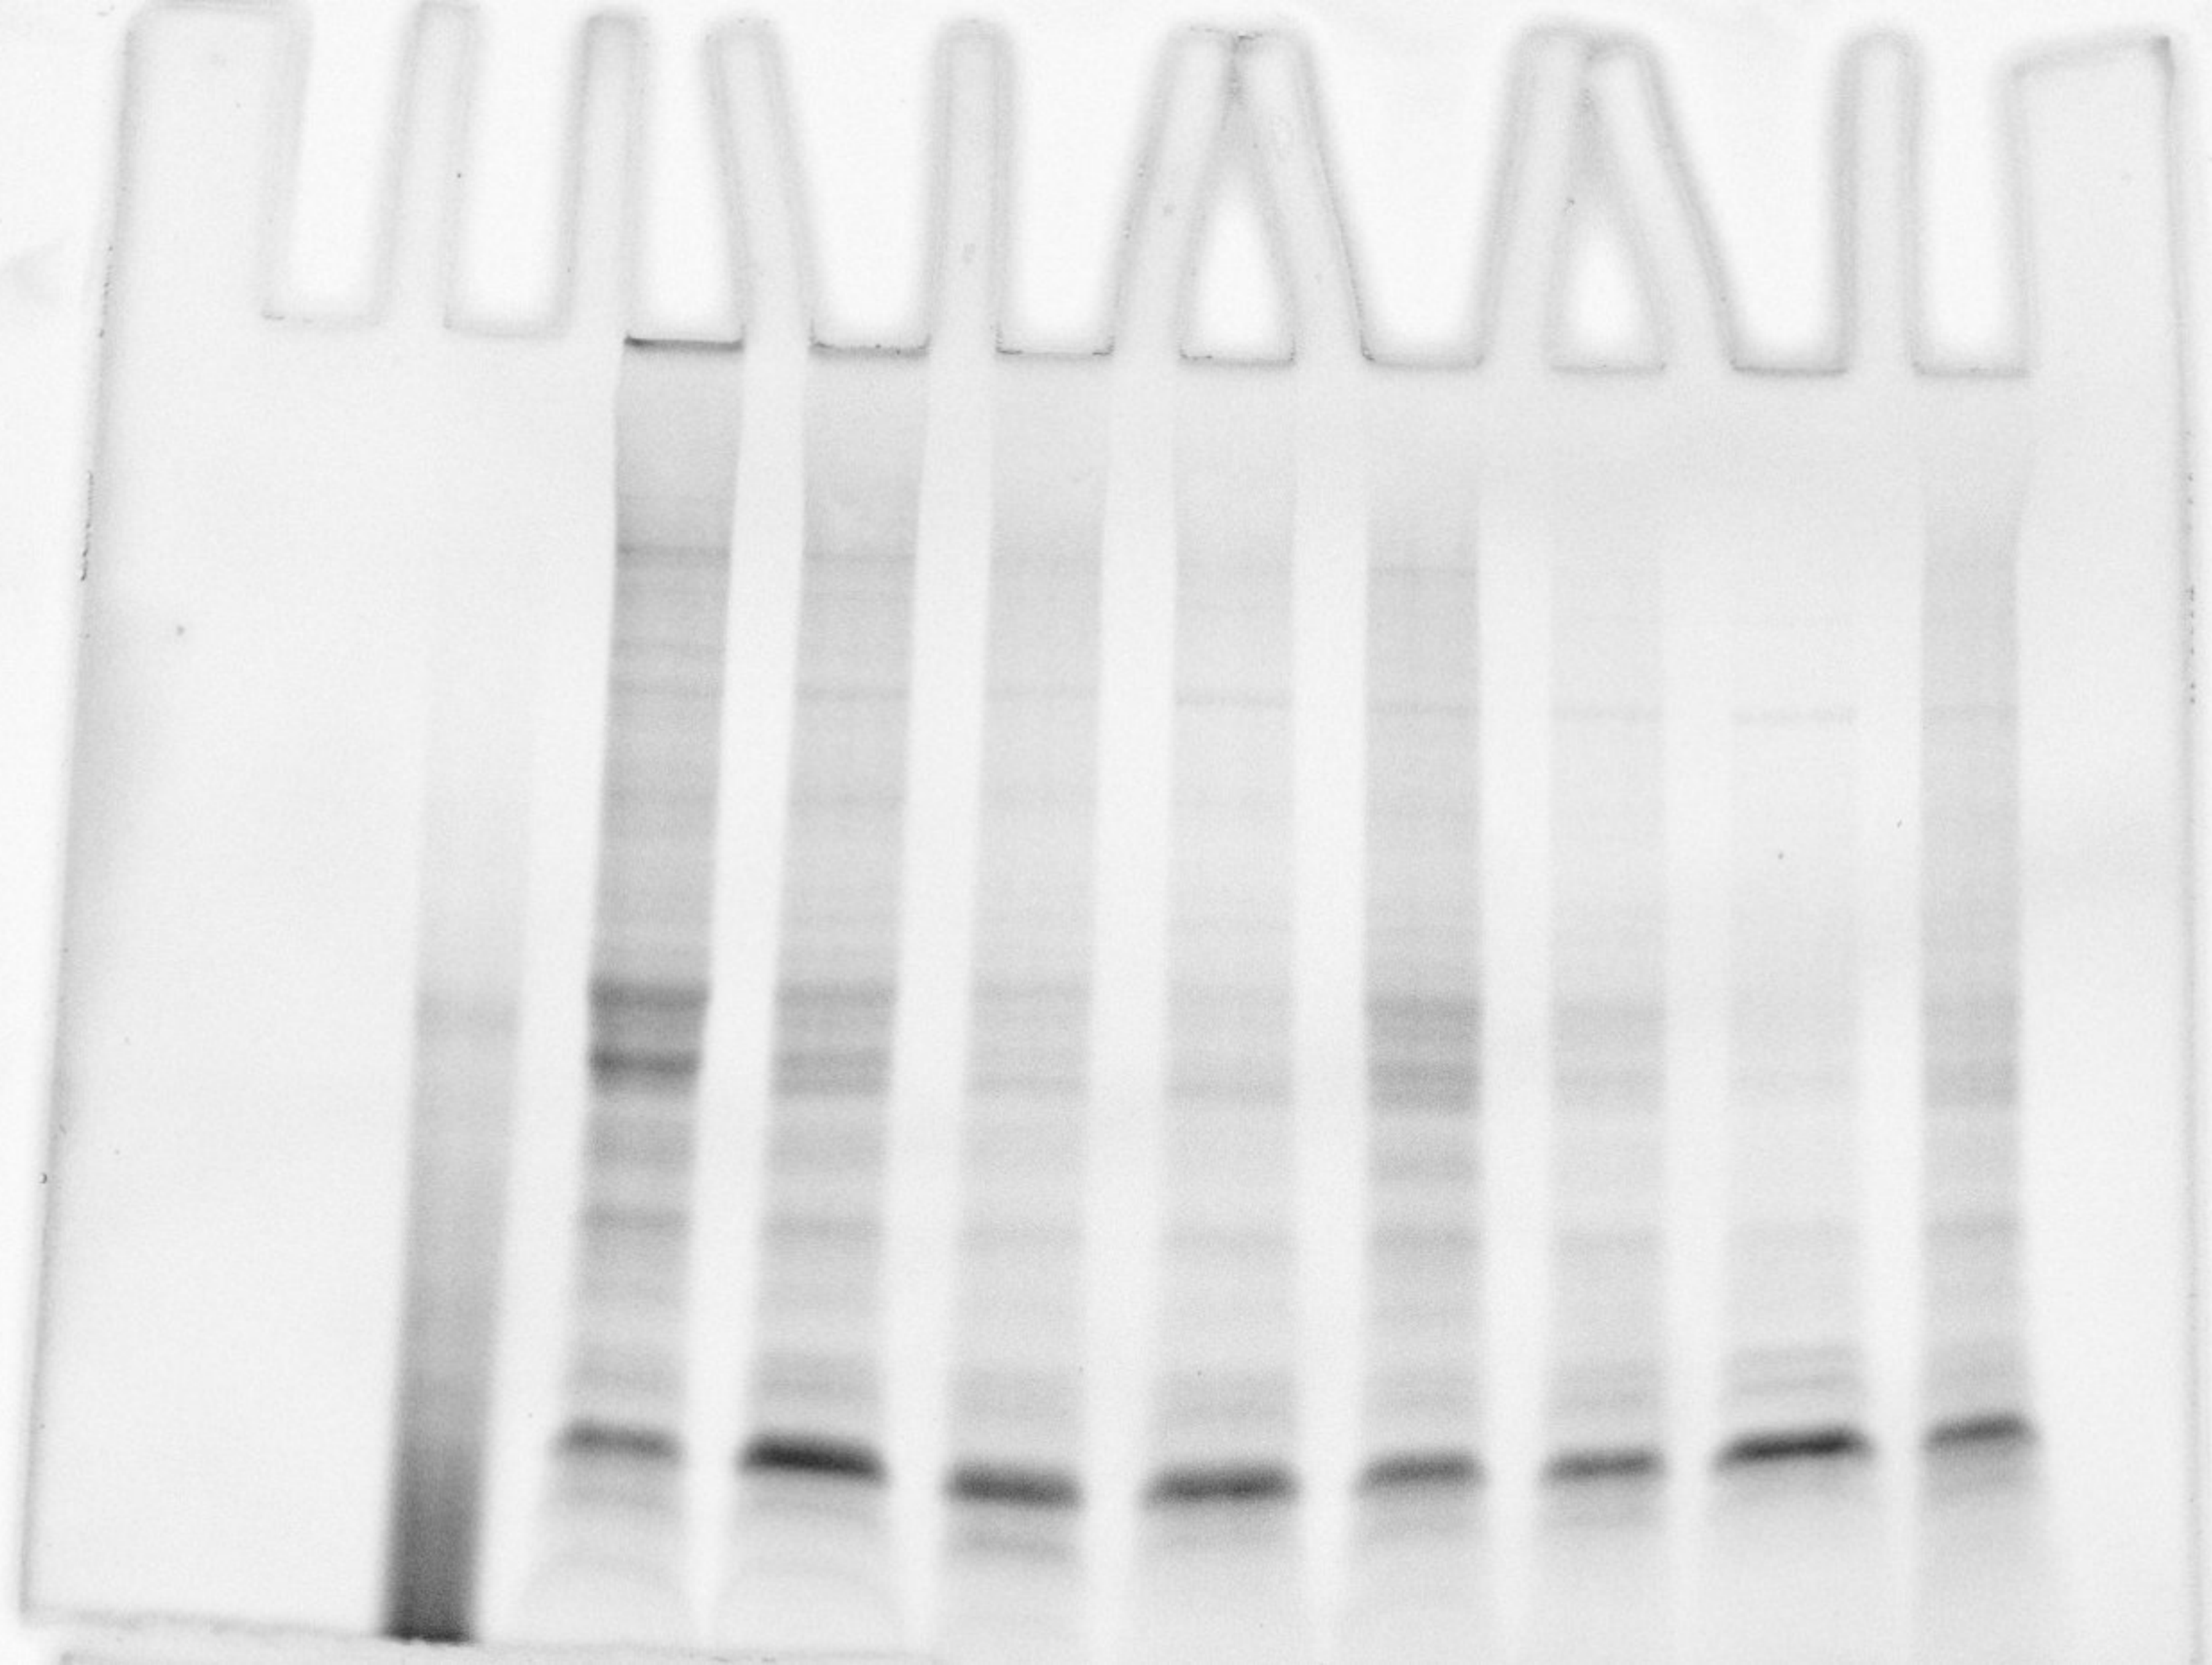

Supplement: EMMM-12-e10722-s004.pdf [file EMMM-12-e10722-s004.pdf]
